# Supplementary figures and images for: Vimentin Is a Novel Anti-Cancer Therapeutic Target; Insights from In Vitro and In Vivo Mice Xenograft Studies
Source: PubMed Central journal article supplement (PMC2855704; doi:10.1371/journal.pone.0010105), 2010-04-16

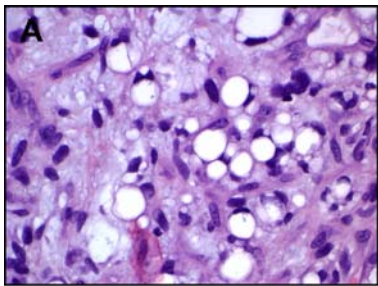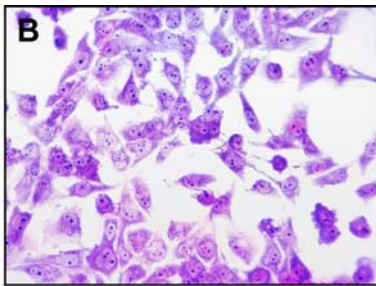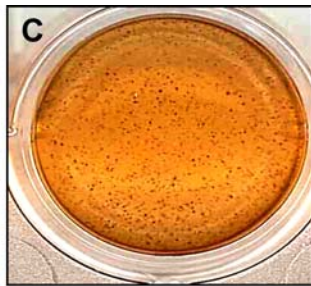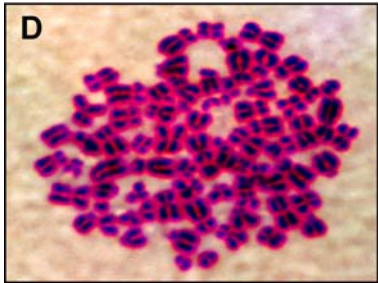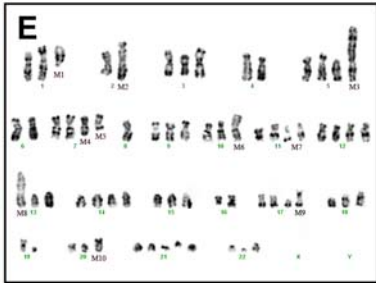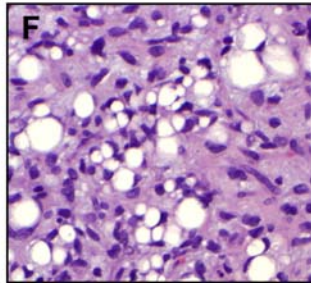

Supplement: pone.0010105.s002.pdf [file pone.0010105.s002.pdf]

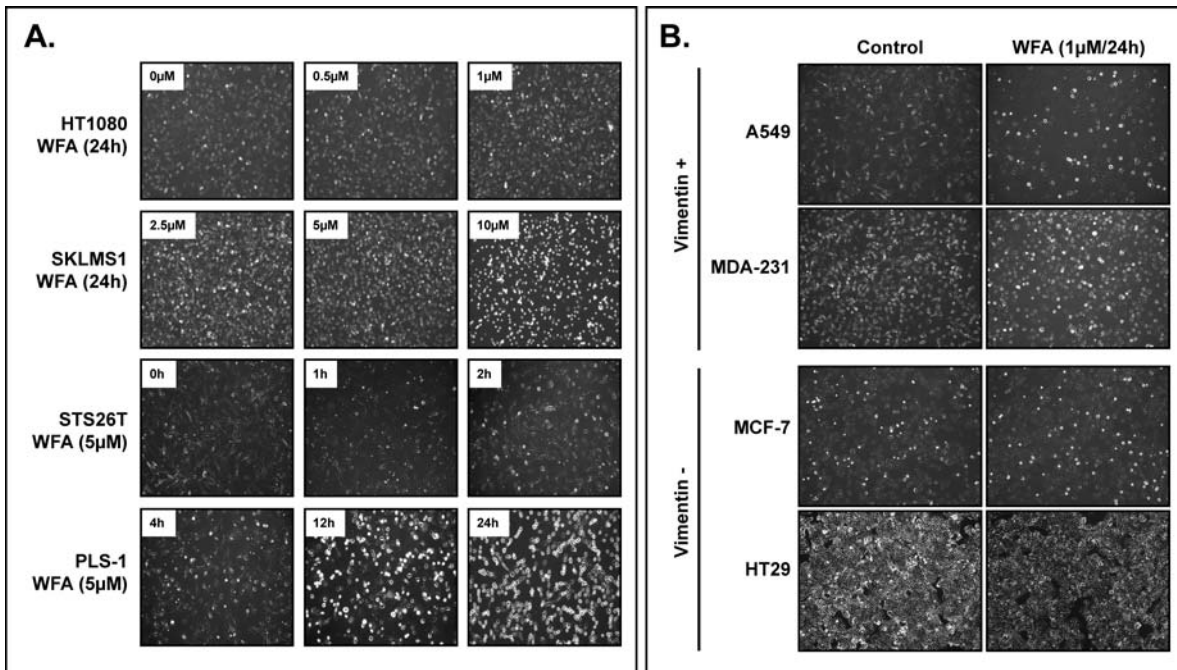

Supplement: pone.0010105.s003.pdf [file pone.0010105.s003.pdf]

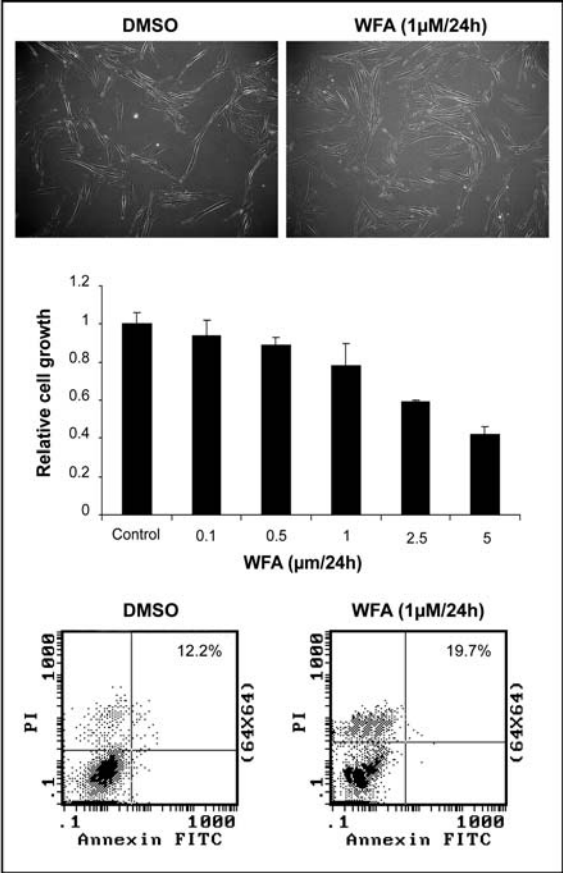

Supplement: pone.0010105.s004.pdf [file pone.0010105.s004.pdf]

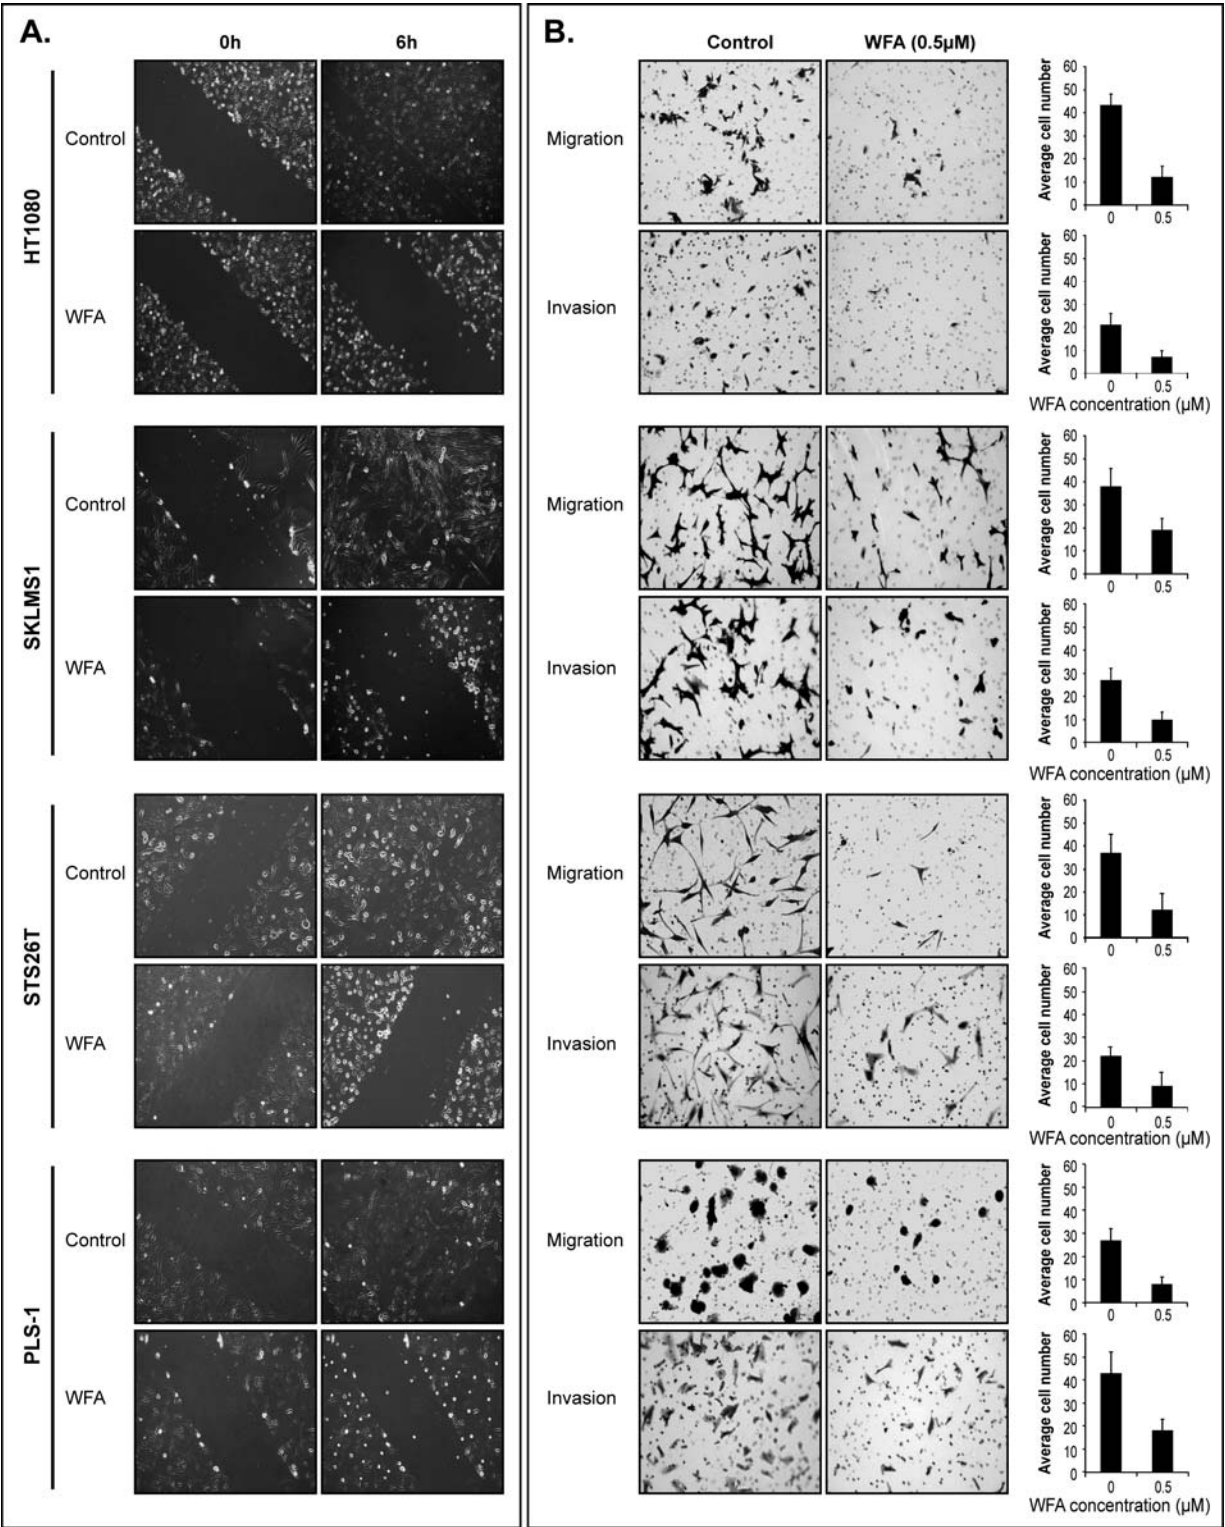

Supplement: pone.0010105.s005.pdf [file pone.0010105.s005.pdf]
